# Supplementary material for: Evaluation of simulated CO 2 power plant plumes from six high-resolution atmospheric transport models
Source: Copernicus journal article supplement (doi:10.5194/acp-2022-645), 2022-10-14
Supplement: Supplementary file 1 [file acp-2022-645-supplement.zip]

Archive with 3 entries (3 files):
- Supplement_S1_Power_Plant_Model_Evaluation_v4.pdf
- Supplement_S2_powerplant_modeling_protocol.pdf
- Supplement_S3_Power_Plant_Model_Evaluation.zip
