# Supplementary material for: Evaluation of simulated CO 2 power plant plumes from six high-resolution atmospheric transport models
Source: Copernicus journal article supplement (doi:10.5194/acp-2022-645), 2022-10-14
Supplement: Supplementary file 1 [file acp-2022-645-supplement.zip › Supplement_S1_Power_Plant_Model_Evaluation_v4.pdf]

S1 Additional Figures

S1.1 Transects

5 All flights were divided into individual plume transects. For each transect, a Gaussian curve was fitted to both the observations and to all model simulations. Measurements and model values belonging to a given transect were labelled with a unique transect number (tsc) and a not necessarily unique distance number (dst), because sometimes multiple transects were flown at the same distance from the power plant. The following figures show maps and vertical cross-sections of the transect numbering as well as examples of the Gaussian curve fitting procedure.

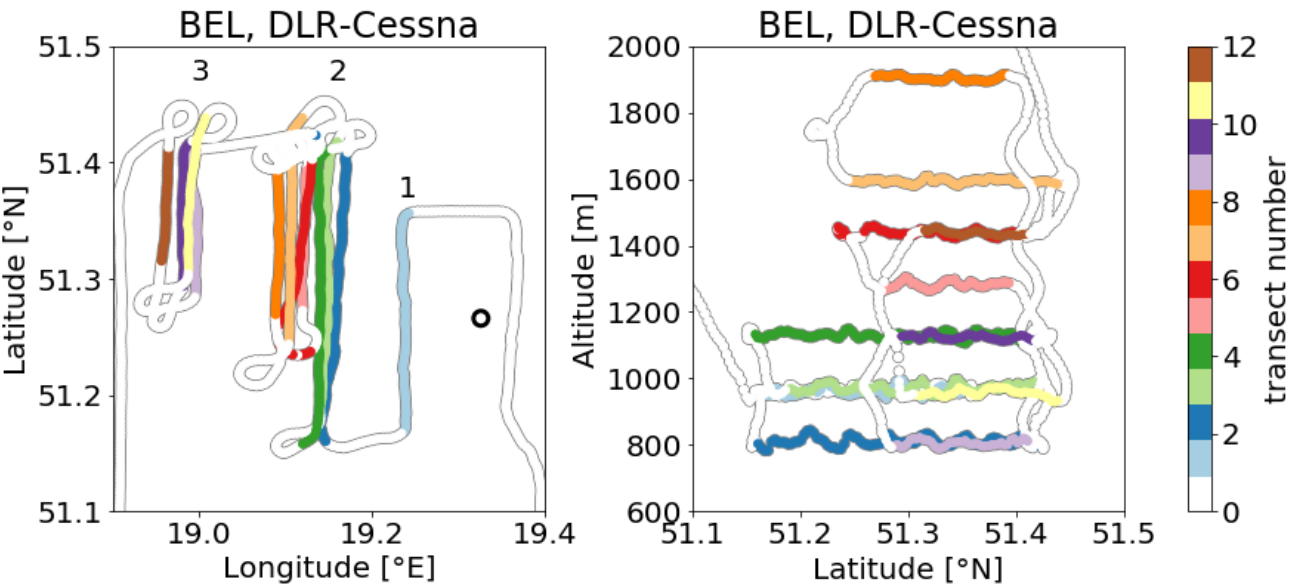

**Figure S1.** In-situ CO<sub>2</sub> transects from DLR-Cessna aircraft on 7 June 2018 at Belchatow. Left: Latitude versus longitude map of flight track. The open circle denotes the position of the power plant. In total 12 transects were flown at 3 different distances from the power plant (labelled 1,2,3). For better visibility, the flight track is increasingly shifted to the west with increasing altitude. Right: North-south cross-section (altitude versus latitude).

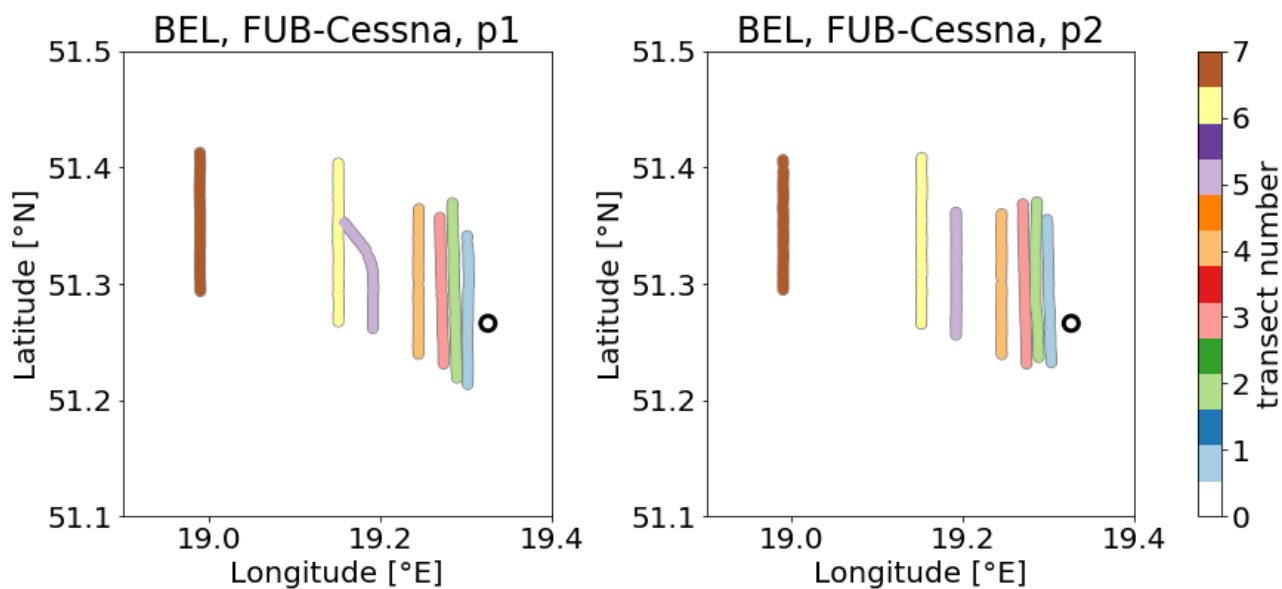

**Figure S2.** MAMAP total column XCO<sub>2</sub> transects from the FUB-Cessna aircraft on 7 June 2018 at Belchatow. Transects are numbered by increasing distance from the power plant. Left: Latitude versus longitude map of the first flight between 12:20 - 13:27 UTC. Right: Second flight between 13:42 - 14:45 UTC.

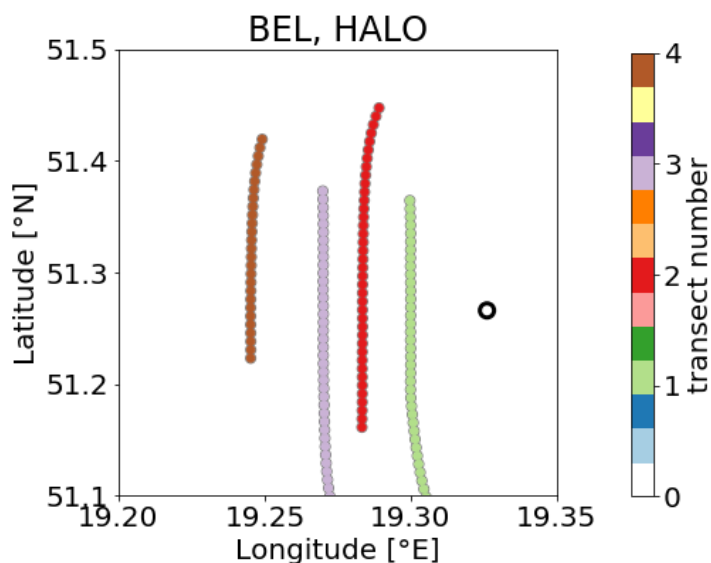

**Figure S3.** CHARM-F total column XCO<sub>2</sub> transects from the HALO aircraft on 7 June 2018 at Belchatow. Transects are numbered by increasing distance from power plant.

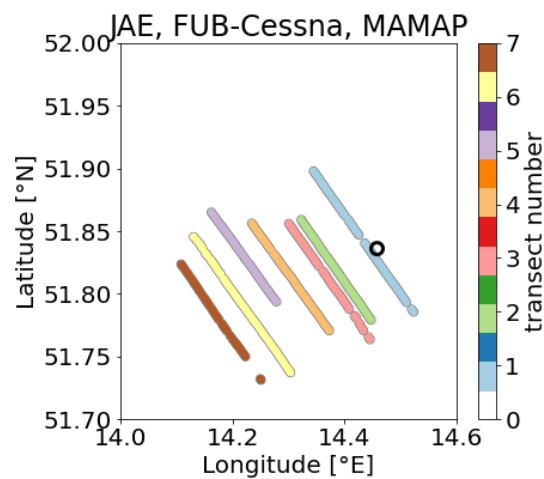

**Figure S4.** MAMAP total column XCO<sub>2</sub> transects from the FUB-Cessna aircraft on 23 May 2018 at Jämschwalde. Transects are numbered by increasing distance from power plant.

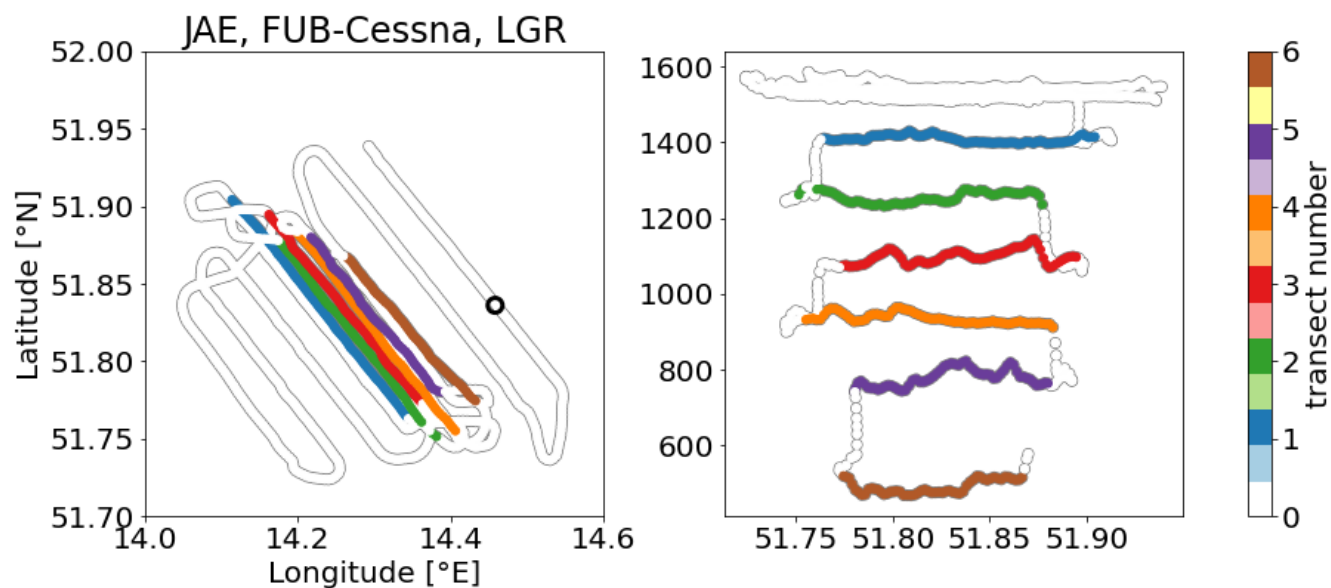

**Figure S5.** LGR in-situ CO<sub>2</sub> transects from the FUB-Cessna aircraft on 23 May 2018 at Jämschwalde. Transects are numbered by increasing distance from the power plant or by decreasing altitude. Left: Latitude versus longitude map. Right: North-south cross-section (altitude versus latitude).

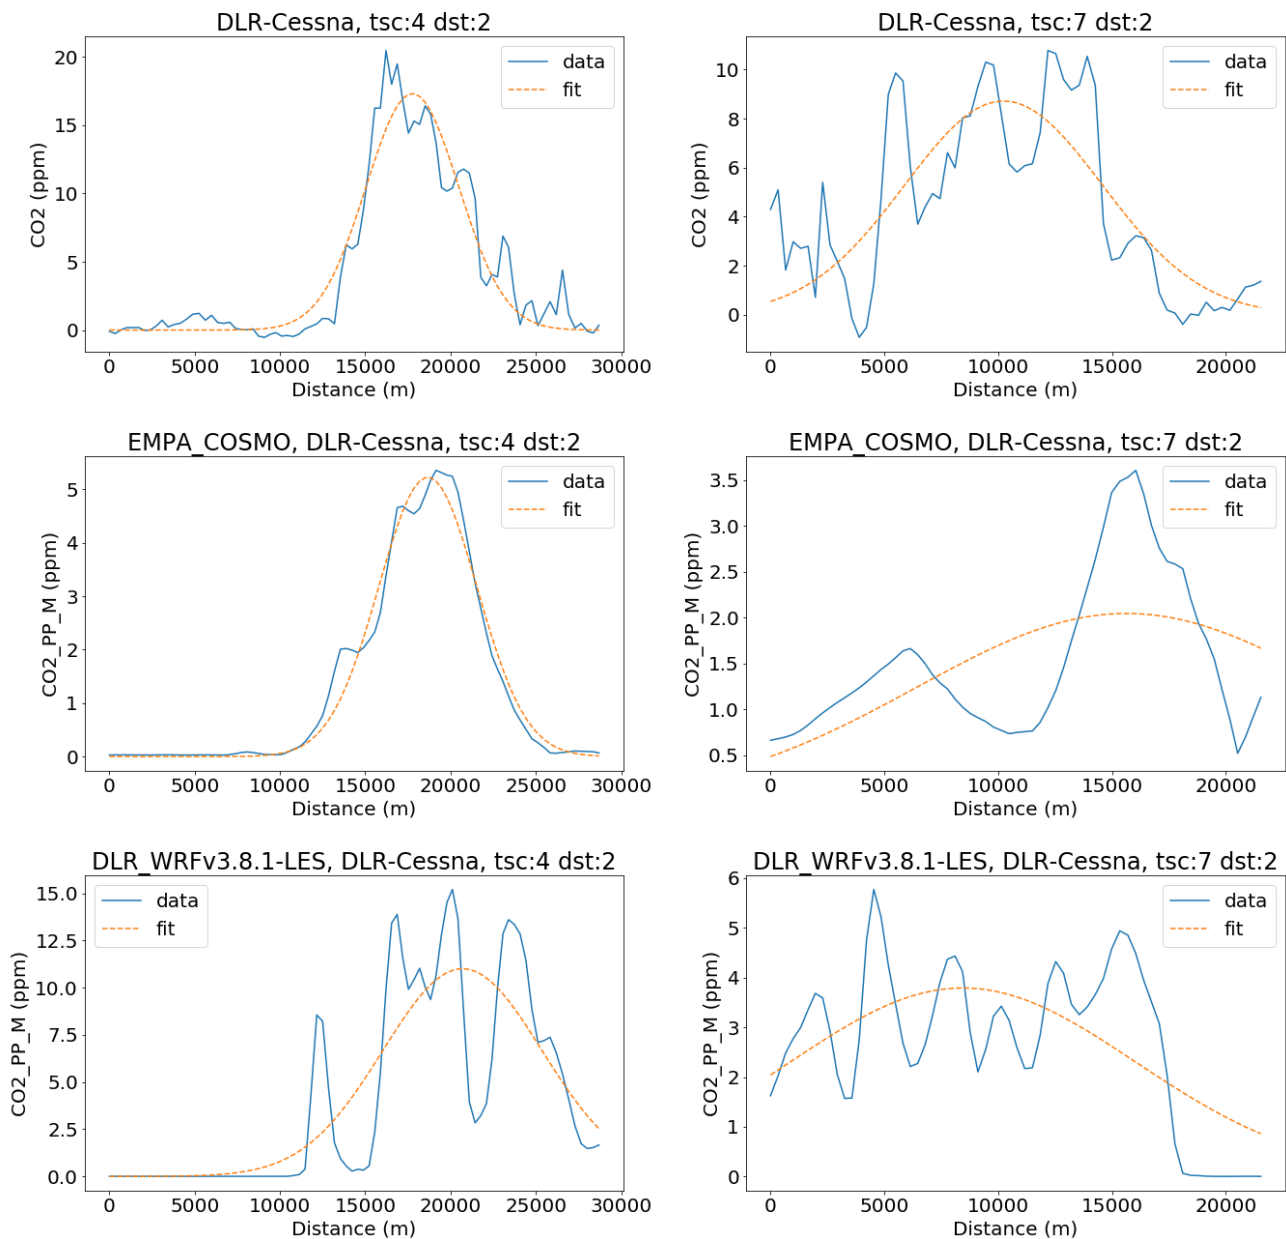

**Figure S6.** Examples of Gaussian curves fitted to individual transects of CO<sub>2</sub> measurements from the DLR-Cessna aircraft and corresponding fits for two selected models. The individual fit parameters are amplitude, width and horizontal shift of the curve. For each plume transect, a background varying linearly between data points directly before and after the plume is subtracted from the measurements. No background needs to be subtracted from the simulations.

## S1.2 Maps of total column XCO<sub>2</sub>

10 The following figure shows maps of total column XCO<sub>2</sub> from six model simulations for the power plant Jämschwalde on 23 May 2018, 10:00 UTC. No simulations were performed for Jämschwalde with EULAG and the high-resolution version of WRF-GHG.

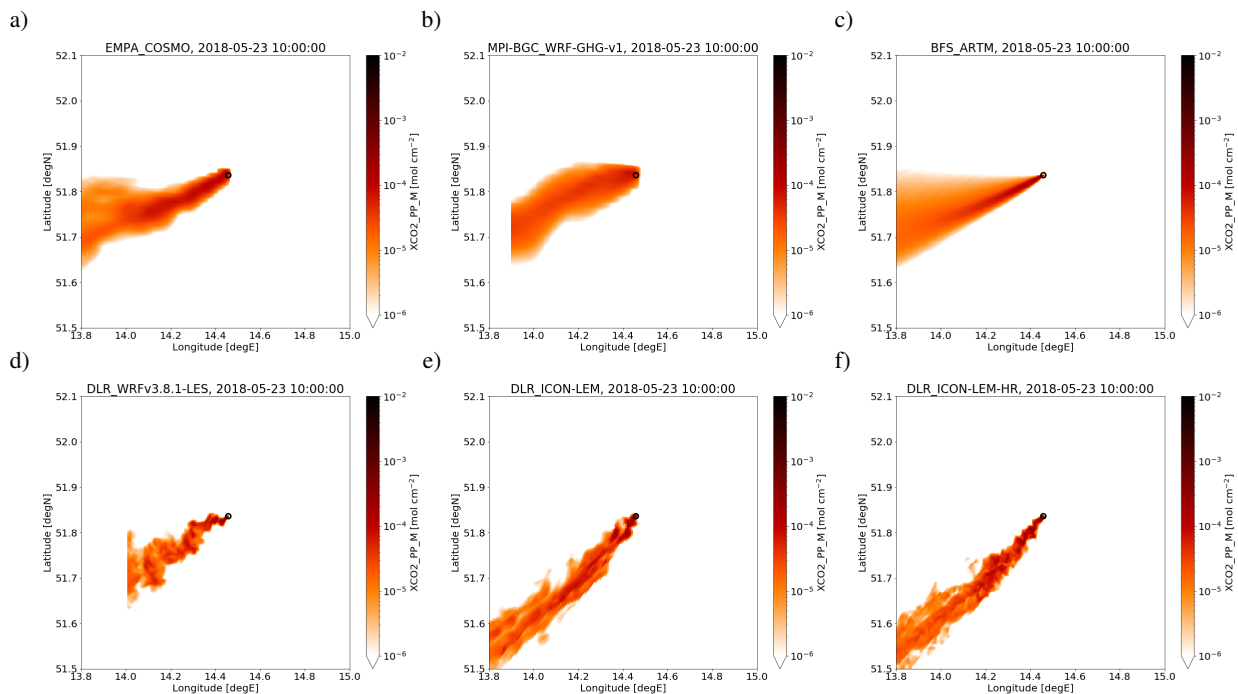

**Figure S7.** Model simulated total column XCO<sub>2</sub> for the Jaenschwalde plume on 23 May 2018 at 10:00 UTC.

### S1.3 Curtains of CO<sub>2</sub> and wind speed

For Belchatow, the following figures show curtains of the high (CO<sub>2</sub>\_PP\_H) and low release tracer (CO<sub>2</sub>\_PP\_L) and wind speed (WS) along the DLR-Cessna flight. For Jämschwalde, the figures show curtains of the middle release tracer CO<sub>2</sub>\_PP\_M and potential temperature and wind speed along the second part of the FUB-Cessna flight which was dedicated to in-situ sampling of the plume at multiple levels. Note that no meteorological measurements are available for the FUB-Cessna aircraft.

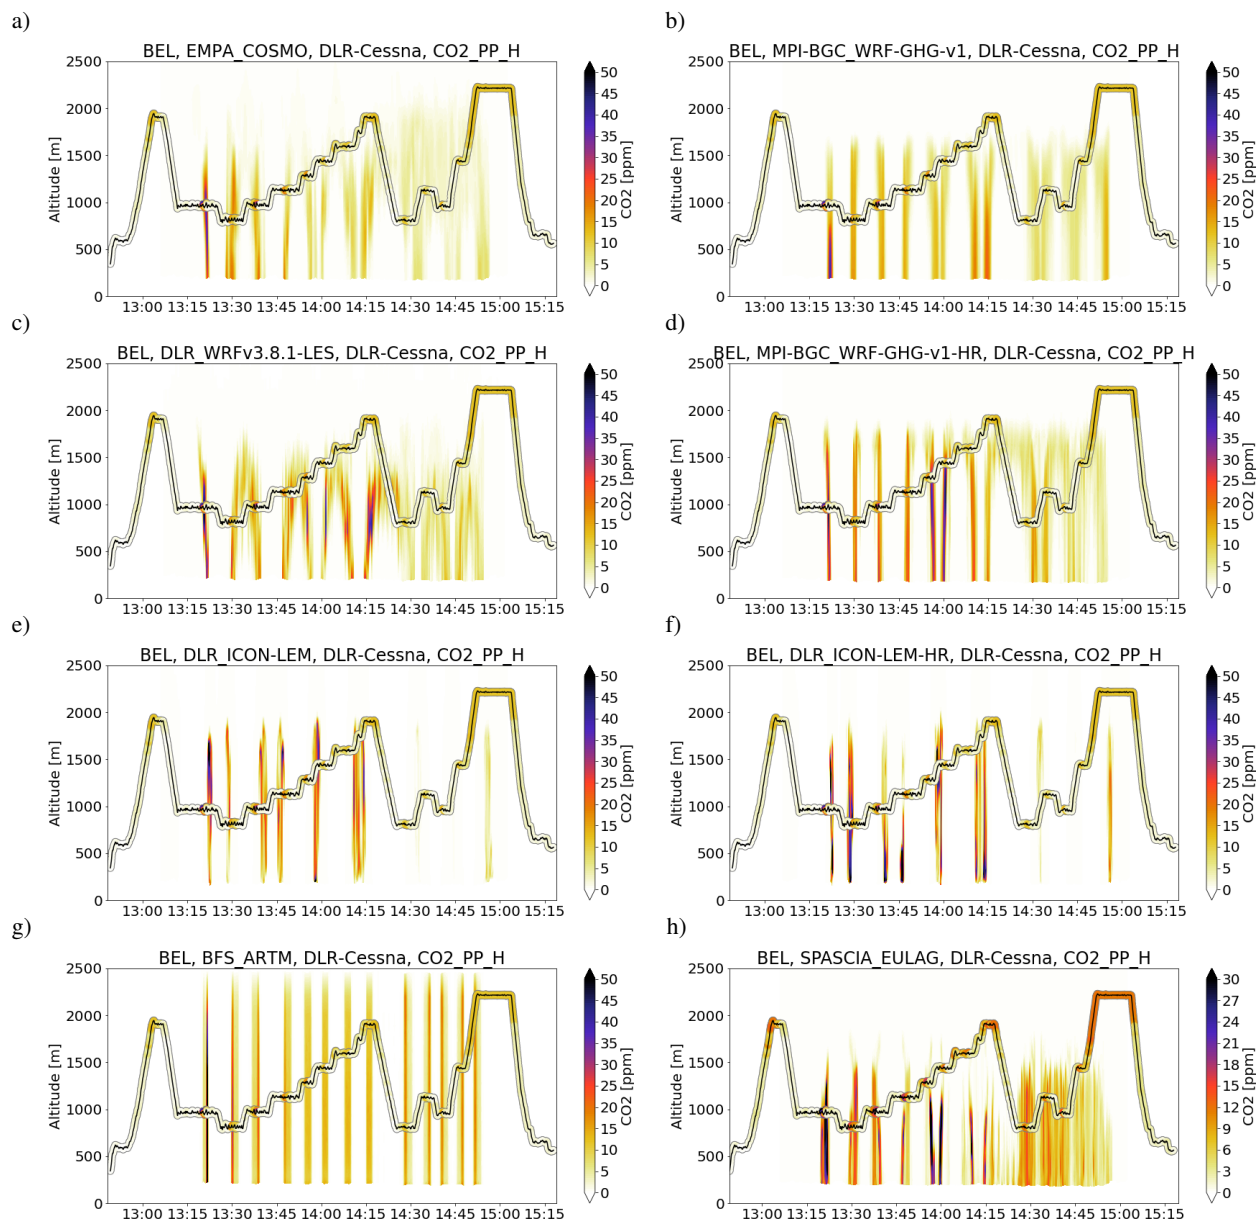

**Figure S8.** Curtains of the Belchatow CO<sub>2</sub> plume along the DLR-Cessna flight on 7 June 2018. Figures for high release tracer CO<sub>2</sub>\_PP\_H.

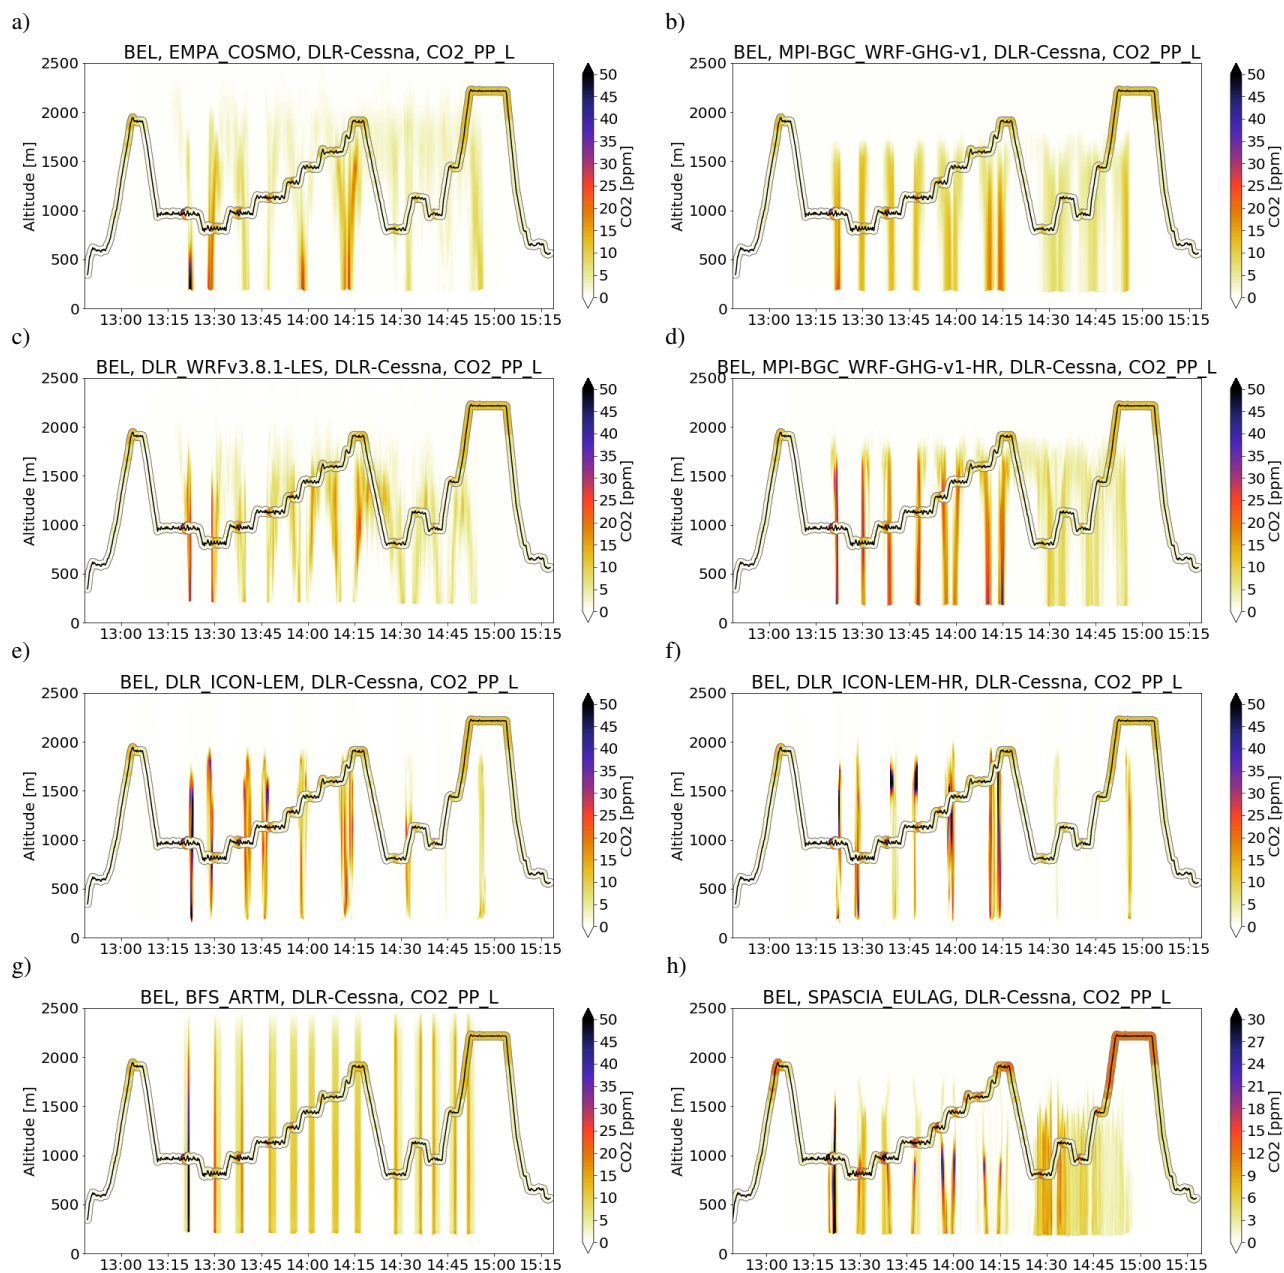

**Figure S9.** Curtains of the Belchatow CO<sub>2</sub> plume along the DLR-Cessna flight on 7 June 2018. Figures for low release tracer CO<sub>2</sub>\_PP\_L.

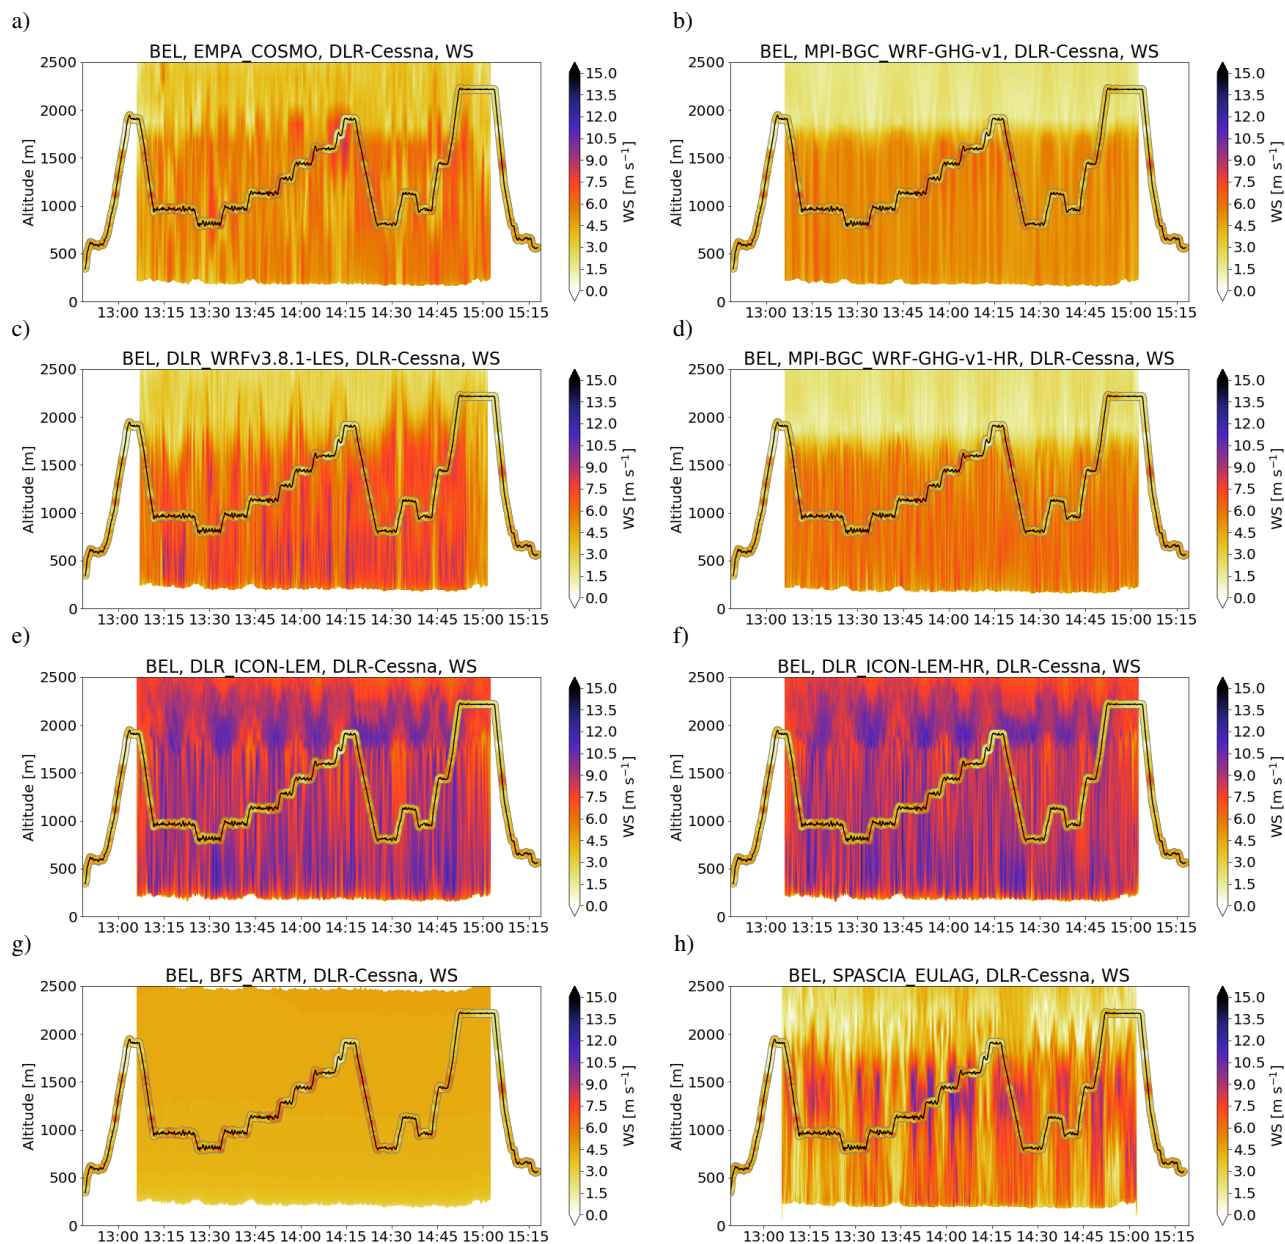

**Figure S10.** Curtains of wind speed along the DLR-Cessna flight on 7 June 2018.

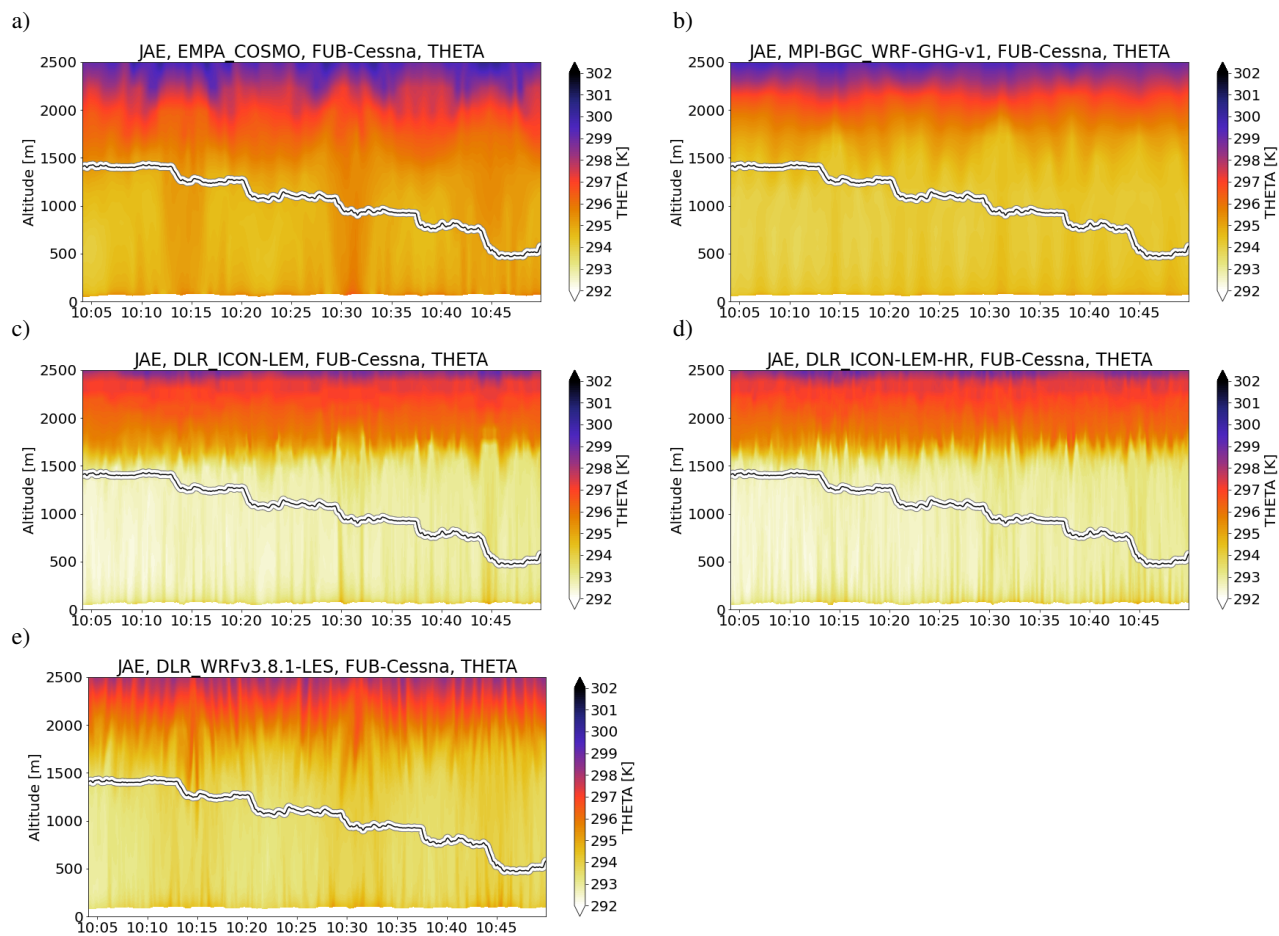

**Figure S11.** Curtains of potential temperature along the FUB-Cessna flight on 23 May 2018.

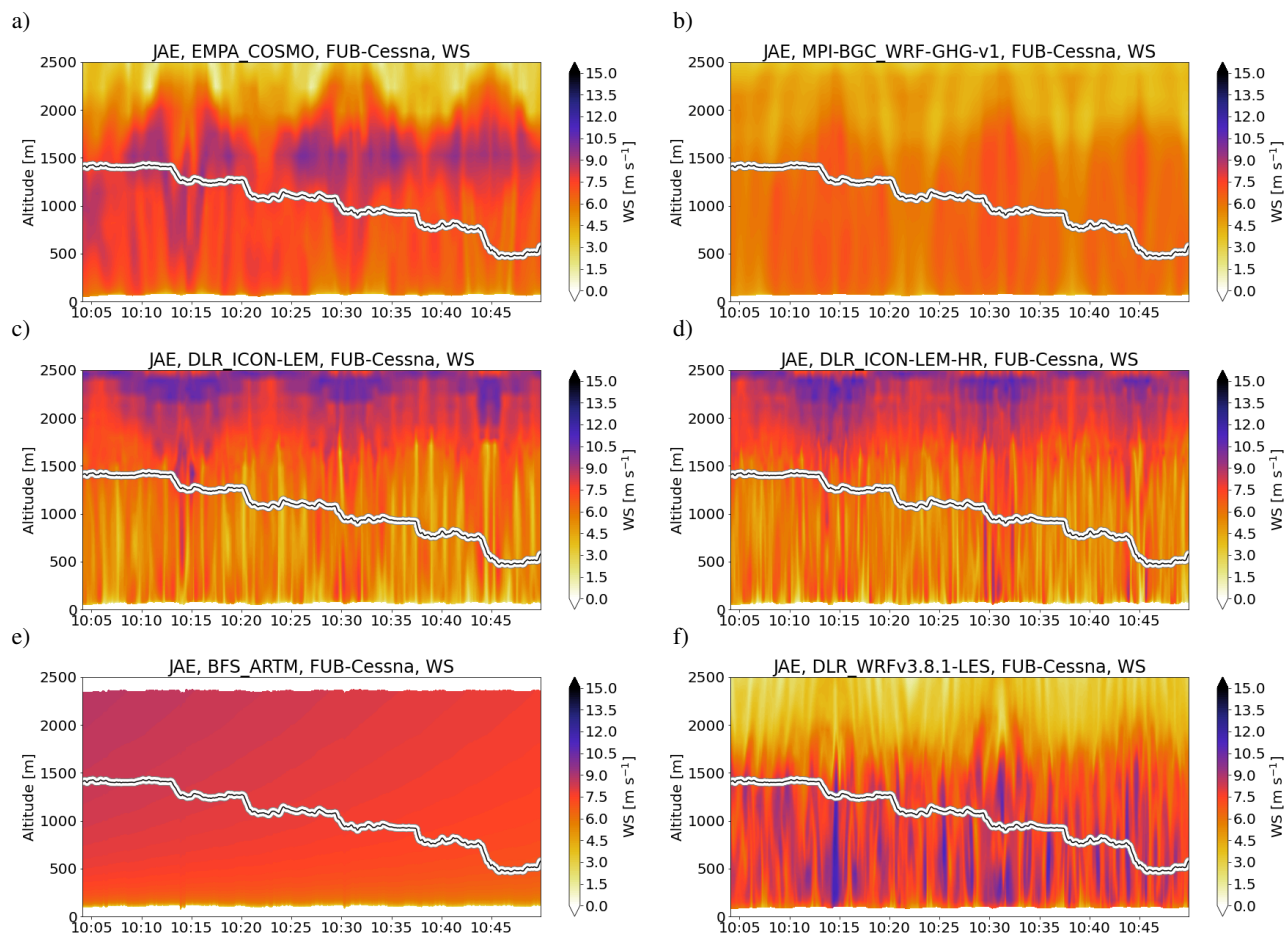

**Figure S12.** Curtains of wind speed along the FUB-Cessna flight on 23 May 2018.

## S1.4 Top view on in-situ CO<sub>2</sub>

The following two figures compare in-situ observed and simulated CO<sub>2</sub> along the flight track of the DLR-Cessna aircraft on 7 June 2018 at Belchatow and the FUB-Cessna aircraft on 23 May 2018 at Jänschwalde, respectively.

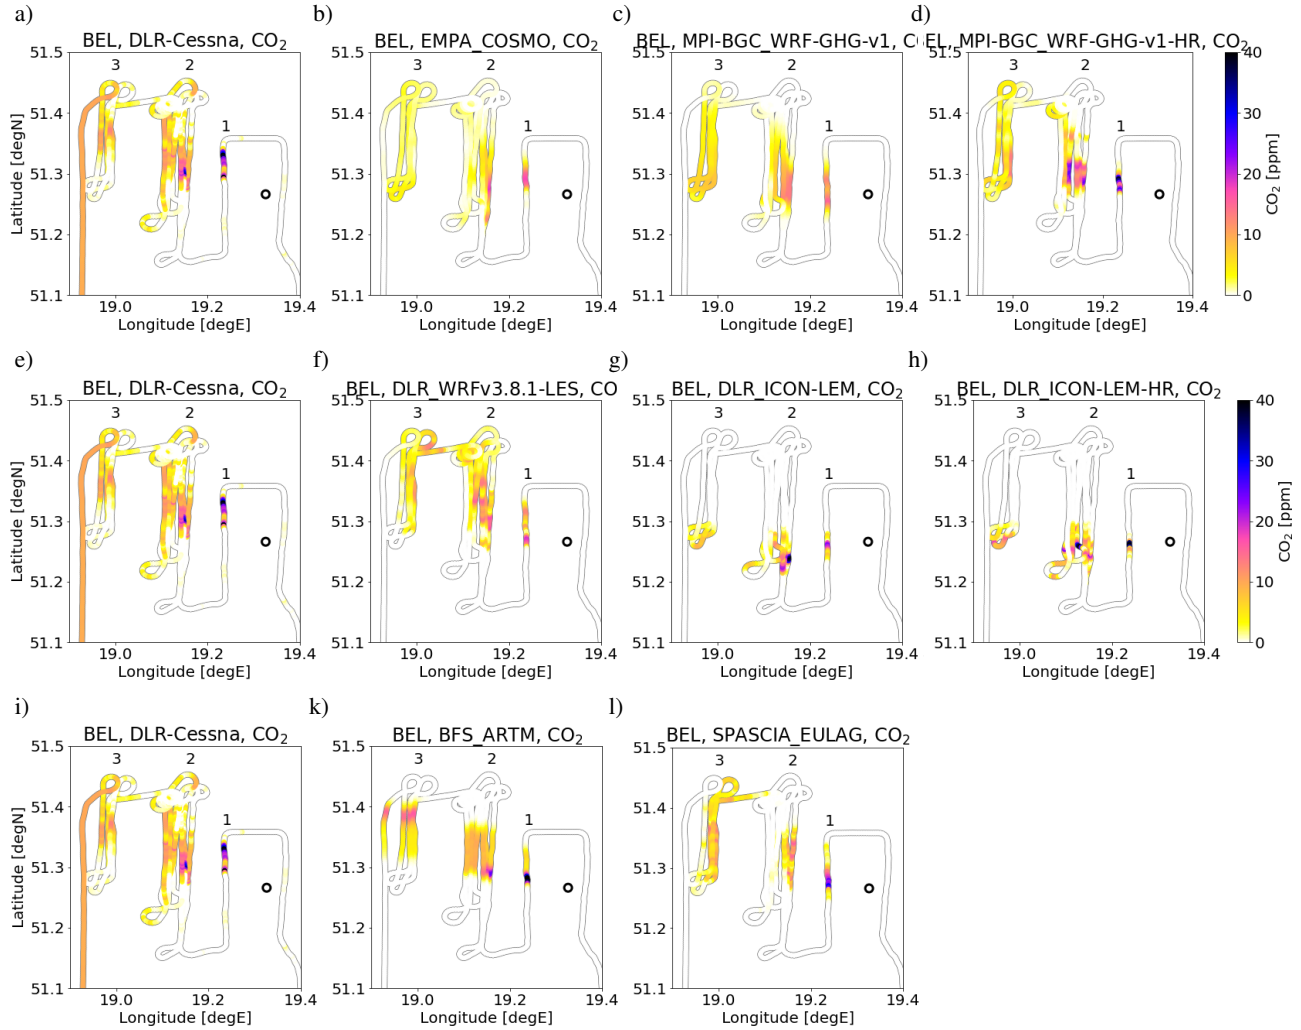

**Figure S13.** Latitude-longitude projection of in-situ CO<sub>2</sub> along DLR-Cessna flight at Belchatow on 7 June 2018. The left-hand figures in all rows present the observations as reference. The remaining figures show model results for the middle release tracer CO<sub>2</sub>\_PP\_M. For better visibility of the data along overlapping transects, the aircraft longitudes have been shifted towards the west with increasing altitude.

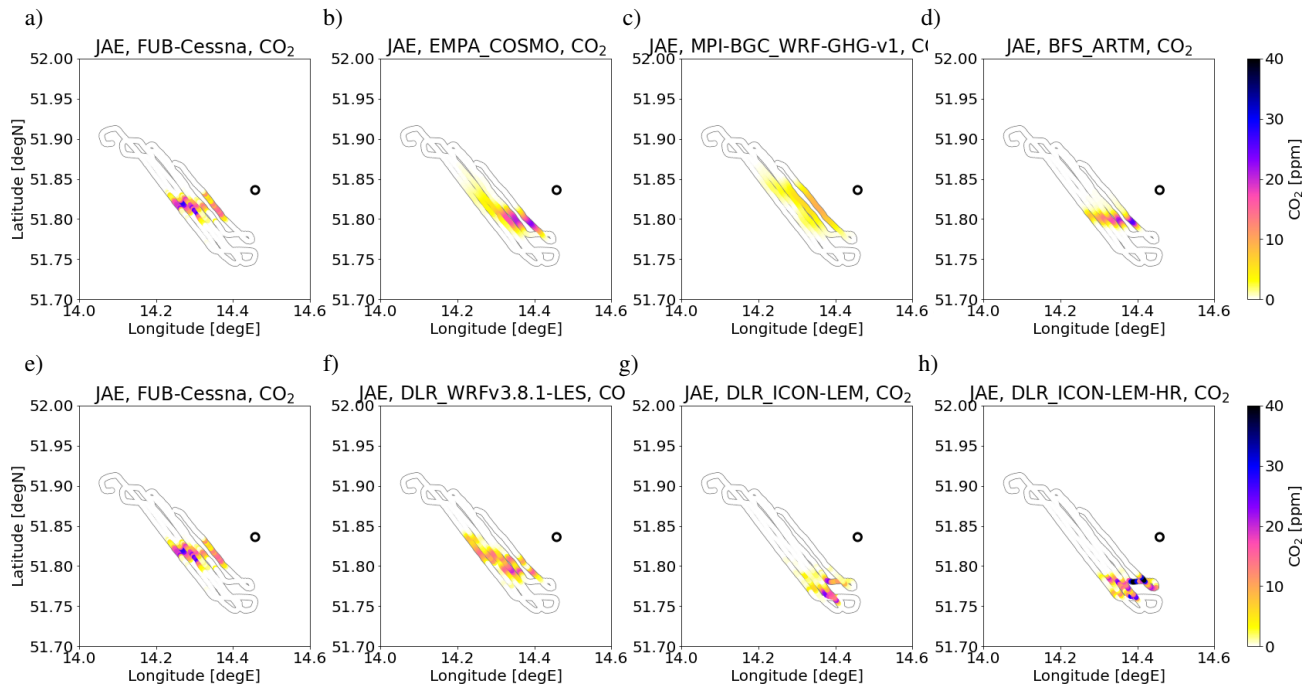

**Figure S14.** Latitude-longitude projection of in-situ CO<sub>2</sub> along FUB-Cessna flight at Jämschwalde on 23 May 2018. The left-hand figures in both rows show the observations as reference. The remaining figures show simulations for the middle release tracer CO<sub>2</sub>\_PP\_M. For better visibility of the data along overlapping transects, the aircraft longitudes have been shifted towards the west with increasing altitude

## 20 S1.5 Time series of meteorological parameters

The following figures compare time series of observed and simulated wind speed and potential temperature along the DLR-Cessna flight at Belchatow on 7 June 2018. No meteorological measurements are available for the FUB-Cessna flight at Jänschwalde on 23 May 2018.

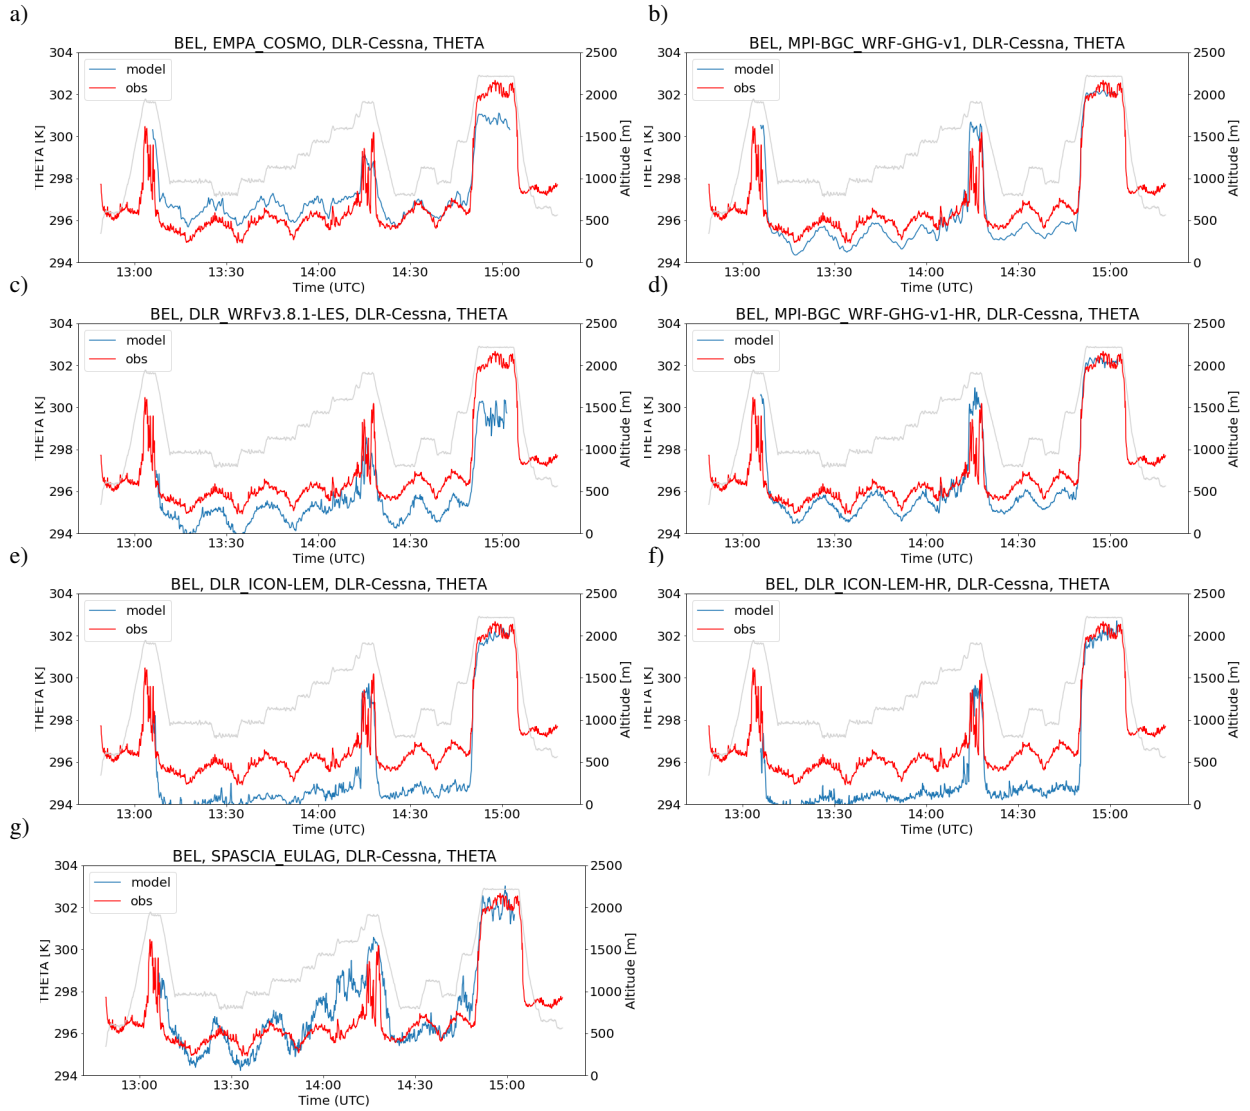

**Figure S15.** Time series of potential temperature along the DLR-Cessna flight on 7 June 2018.

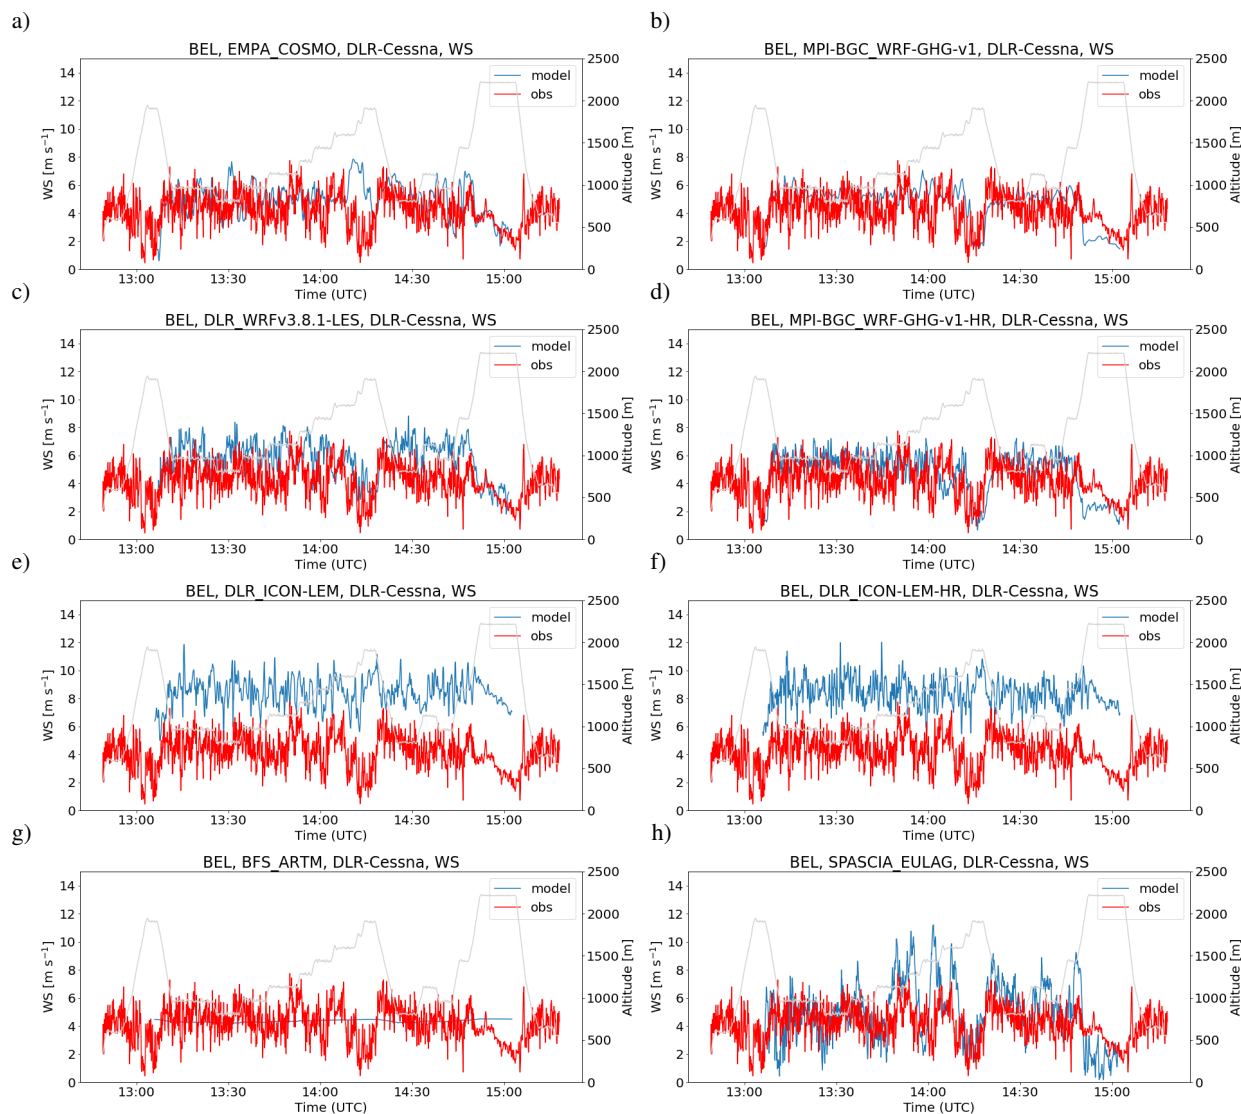

**Figure S16.** Time series of wind speed along the DLR-Cessna flight on 7 June 2018.

## S1.6 Time series of CHARM-F and model simulated column CO<sub>2</sub> at Jänschwalde

- 25 The following figure compares total column CO<sub>2</sub> above background observed with the CHARM-F lidar on the HALO aircraft with corresponding simulated columns.

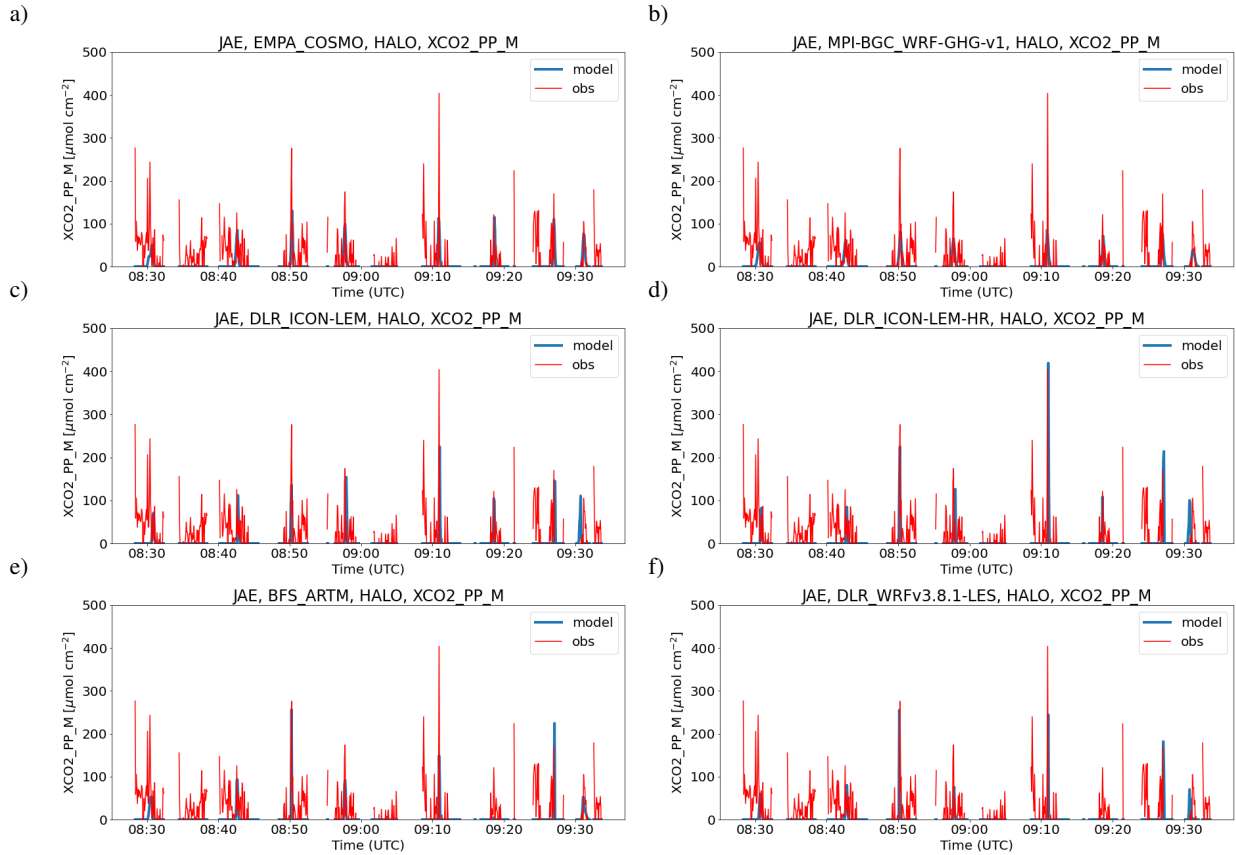

**Figure S17.** Time series of CO<sub>2</sub> column enhancements simulated and observed by CHARM-F along the HALO flight at Jänschwalde on 23 May 2018.
